# Supplementary material for: From Engineering Hydrology to Earth System Science: Milestones in the Transformation of Hydrologic Science
Source: Copernicus journal article supplement (doi:10.5194/hess-2017-670), 2017-11-15
Supplement: Supplementary file [file hess-2017-670-SC1-supplement.pdf]

## Another eye into the world of the Budyko hypothesis

In a wide sweeping survey of the hydrology landscape, Sivapalan's discussion on the Budyko hypothesis or curve in evapotranspiration has piqued my curiosity (Sivapalan, 2017, lines 659-660, 911-968). This prompts the submission of this personal observation of a resemblance or similarity between it and the Bakhmeteff function describing an overland flow hydrograph.

Figures 1 and 2 show the Budyko curve (e.g., Zhang et al., 2004, Figure 1; especially Padrón et al., 2017, Figure 2) and the Bakhmeteff function (Ding, 2011, Figure 3), respectively. These are a simple expression of scientific facts from two seemingly dissimilar worlds. But their similarity is stunning; hinting at certain first principles at work.

The Budyko curve partitions the precipitation ( $P$ ) into evapotranspiration ( $ET$ ) explicitly and runoff ( $Q$ ) implicitly and on an annual timescale, but the overland flow model does neither. (In a dimensionless S-curve hydrograph shown in Figure 2, the Bakhmeteff function on the X-axis is a time parameter,  $F(v, N) = \int_{v=0}^v \frac{dv}{1-v^N}$ .)

But based on their apparent similarity, the Bakhmeteff function, on a storm event timescale, maybe made to imitate the Budyko curve and on an annual timescale too, thereby entering an uncharted waters between the two worlds.

Since  $Q$  and  $ET$  are complementary to each other if, and only if, the storage carryover effect is negligible, i.e.,  $\frac{\Delta S}{\Delta t} = P - Q - ET \cong 0$ , the similarity may not be a coincidence after all.

From this perspective, a new  $\frac{Q}{P}$  vs.  $\phi$  curve in Figure 1 will be merely a mirror image of the Budyko curve.

In Figure 2, the dummy variable  $v$  on the Y-axis is actually a normalized runoff ratio,  $v = (\frac{Q}{P})^{\frac{1}{N}}$ , in which  $N$  is a storage exponent in  $Q \sim S^N$ . Equating the respective  $\frac{Q}{P}$  term in Figures 1 and 2 yields a parametric relation below:

$$\boxed{v^N = (1 + \phi^\omega)^{\frac{1}{\omega}} - \phi}, \quad (1)$$

The distinctly different Bakhmeteff function  $F(v, N)$  thus represents a fresh eye from the variable instantaneous unit hydrograph (vIUH) model peering into the world of the Budyko hypothesis.

## References

- Ding, J. Y., 2011. A measure of watershed nonlinearity: interpreting a variable instantaneous unit hydrograph model on two vastly different sized watersheds, *Hydrol. Earth Syst. Sci.*, 15, 405-423, <https://doi.org/10.5194/hess-15-405-2011>.
- Padrón, R.S., Gudmundsson, L., Greve, P. and Seneviratne, S.I., 2017. Large-Scale Controls of the Surface Water Balance Over Land: Insights From a Systematic Review and Meta-Analysis. *Water Resources Research*.
- Sivapalan, M., 2017. From Engineering Hydrology to Earth System Science: Milestones in the Transformation of Hydrologic Science, *Hydrol. Earth Syst. Sci. Discuss.*, <https://doi.org/10.5194/hess-2017-670>, in review.
- Zhang, L., Hickel, K., Dawes, W.R., Chiew, F.H., Western, A.W. and Briggs, P.R., 2004. A rational function approach for estimating mean annual evapotranspiration. *Water Resources Research*, 40(2).

Figure 1. The Budyko curve.

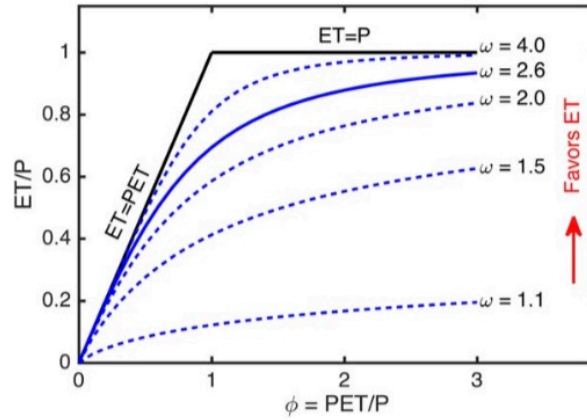

Figure 2. The original Budyko curve representing  $ET/P$  as a function of  $\phi = PET/P$  (continuous line). Solutions to Fu's equation for different values of  $\omega$  are shown as dashed lines. Note that higher values of  $\omega$  result in higher  $ET/P$ , and thus favor ET over R.

Source: Padrón et al. (2017)

Figure 2. The Bakhmeteff function and its S-curve hydrograph for overland flow,  $N = 1.67$  being a typical storage exponent.

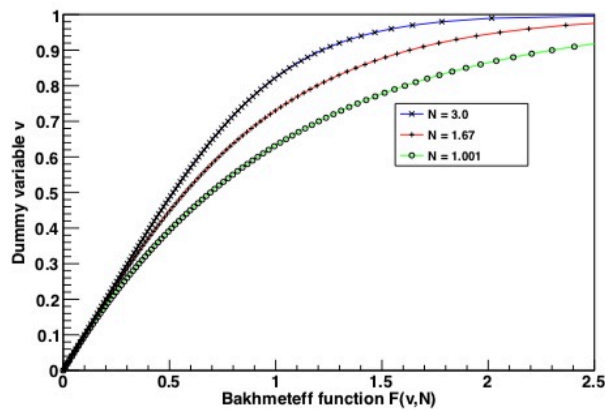

Fig. 3. The Bakhmeteff varied-flow function for three different degrees of watershed nonlinearity,  $N$ .  $N = 1.001$  for nearly linear, 1.67 for moderately nonlinear, and 3.0 for highly nonlinear watersheds.

Source: Ding (2011)
